# Supplementary material for: Occupational Hearing Loss Associated with the Combined Exposure of Solvents and Noise: A Systematic Review and Meta-Analysis
Source: MDPI journal article supplement (doi:10.3390/safety9040071), 2023-10-09
Supplement: s1 [file s1]

Review

# Occupational Hearing Loss Associated with the Combined Exposure of Solvents and Noise: A Systematic Review and Meta-Analysis

Jia Ren <sup>1,2</sup>, Hongwei Xie <sup>1</sup>, Yong Hu <sup>1</sup>, Yu Hong <sup>2,\*</sup>, Hua Zou <sup>1,\*</sup> and Xiangjing Gao <sup>1,\*</sup>

**Table S1.** Quality assessment of the cross-sectional studies.

| Criteria                                                                                                                            | Study |      |      |      |      |      |      |      |      |      |      |      |      |      |      |      |      |
|-------------------------------------------------------------------------------------------------------------------------------------|-------|------|------|------|------|------|------|------|------|------|------|------|------|------|------|------|------|
|                                                                                                                                     | [39]  | [40] | [41] | [42] | [43] | [44] | [18] | [23] | [45] | [46] | [47] | [27] | [48] | [11] | [49] | [50] | [51] |
| 1. Define the source of information                                                                                                 | 1     | 1    | 1    | 1    | 1    | 1    | 1    | 1    | 1    | 1    | 1    | 1    | 1    | 1    | 1    | 1    | 1    |
| 2. List inclusion and exclusion criteria for exposed and unexposed subjects or refer to previous publications                       | 1     | 1    | 1    | 1    | 1    | 1    | 0    | 0    | 1    | 1    | 1    | 1    | 1    | 1    | 1    | 1    | 0    |
| 3. Indicate time period used for identifying patients                                                                               | 1     | 1    | 1    | 0    | 1    | 1    | 0    | 1    | 0    | 0    | 1    | 1    | 1    | 1    | 1    | 0    | 0    |
| 4. Indicate whether or not subjects were consecutive if not population-based                                                        | 1     | 1    | 1    | 1    | 1    | 1    | 1    | 1    | 1    | 1    | 1    | 1    | 1    | 1    | 1    | 1    | 1    |
| 5. Indicate if evaluators of subjective components of study were masked to other aspects of the status of the participants          | 0     | 0    | 0    | 0    | 0    | 0    | 0    | 0    | 0    | 0    | 0    | 0    | 0    | 0    | 0    | 0    | 0    |
| 6. Describe any assessments undertaken for quality assurance purposes                                                               | 1     | 1    | 1    | 1    | 1    | 1    | 1    | 1    | 1    | 1    | 1    | 1    | 1    | 1    | 1    | 0    | 1    |
| 7. Explain any patient exclusions from analysis                                                                                     | 0     | 0    | 1    | 1    | 0    | 0    | 1    | 1    | 0    | 0    | 0    | 0    | 0    | 0    | 0    | 0    | 0    |
| 8. Describe how confounding was assessed and/or controlled                                                                          | 1     | 1    | 1    | 0    | 0    | 0    | 0    | 0    | 0    | 0    | 1    | 0    | 0    | 0    | 1    | 1    | 1    |
| 9. If applicable, explain how missing data were handled in the analysis                                                             | 0     | 0    | 0    | 0    | 0    | 0    | 0    | 0    | 0    | 0    | 0    | 0    | 0    | 0    | 0    | 0    | 0    |
| 10. Summarize patient response rates and completeness of data collection                                                            | 0     | 0    | 1    | 0    | 0    | 0    | 0    | 0    | 0    | 0    | 0    | 0    | 0    | 1    | 0    | 0    | 1    |
| 11. Clarify what follow-up, if any, was expected and the percentage of patients for which incomplete data or follow-up was obtained | 0     | 0    | 0    | 0    | 0    | 0    | 0    | 0    | 0    | 0    | 0    | 0    | 0    | 0    | 0    | 0    | 0    |
| Total scores                                                                                                                        | 6     | 6    | 8    | 5    | 5    | 5    | 4    | 5    | 4    | 5    | 6    | 5    | 5    | 6    | 6    | 4    | 5    |

| Criteria                  | Study |      |      |      |      |      |      |      |      |      |      |      |      |      |      |      |      |
|---------------------------|-------|------|------|------|------|------|------|------|------|------|------|------|------|------|------|------|------|
|                           | [39]  | [40] | [41] | [42] | [43] | [44] | [18] | [23] | [45] | [46] | [47] | [27] | [48] | [11] | [49] | [50] | [51] |
| Quality levels            | M     | M    | H    | M    | M    | M    | M    | M    | M    | M    | M    | M    | M    | M    | M    | M    | M    |
| Note: M=Moderate, H=high. |       |      |      |      |      |      |      |      |      |      |      |      |      |      |      |      |      |

**Table S2.** Quality assessment of the cohort studies.

| Criteria         |                                                                              | Study |      |      |      |      |      |
|------------------|------------------------------------------------------------------------------|-------|------|------|------|------|------|
|                  |                                                                              | [33]  | [34] | [35] | [36] | [37] | [38] |
| 1. Selection     | (1) Representativeness of the exposed cohort                                 | 1     | 1    | 1    | 1    | 1    | 1    |
|                  | (2) Selection of the non exposed cohort                                      | 1     | 1    | 1    | 1    | 1    | 1    |
|                  | (3) Ascertainment of exposure                                                | 1     | 1    | 1    | 1    | 1    | 1    |
|                  | (4) Demonstration that outcome of interest was not present at start of study | 0     | 0    | 1    | 1    | 0    | 0    |
| 2. Comparability | (1) Comparability of cohorts on the basis of the design or analysis          | 1     | 1    | 2    | 1    | 1    | 1    |
|                  | (2) Assessment of outcome                                                    | 1     | 1    | 1    | 1    | 1    | 1    |
| 3. Outcome       | (1) Was follow-up long enough for outcomes to occur                          | 1     | 1    | 1    | 1    | 1    | 1    |
|                  | (2) Adequacy of follow up of cohorts                                         | 1     | 1    | 1    | 1    | 1    | 1    |
| Total scores     |                                                                              | 7     | 7    | 9    | 8    | 7    | 7    |
| Quality levels   |                                                                              | M     | M    | H    | H    | M    | M    |

Note: M=Moderate, H=high.
