# Supplementary material for: Occupational Hearing Loss Associated with the Combined Exposure of Solvents and Noise: A Systematic Review and Meta-Analysis
Source: MDPI journal article supplement (doi:10.3390/safety9040071), 2023-10-09
Supplement: s1 [file s1]

Archive with 1 entries (1 files):
- safety-2481540-supplementary.pdf
